# Supplementary material
Source: PubMed Central journal article supplement (PMC7205259)
Supplement: jciinsight-5-134564-s185.pdf [file jciinsight-5-134564-s185.pdf]

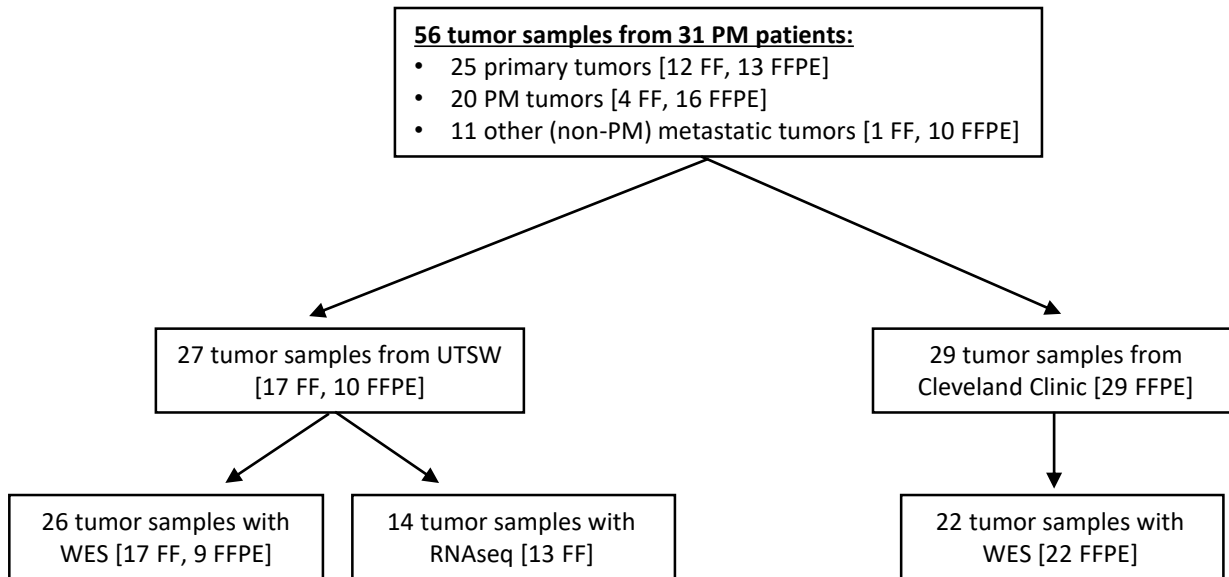

**Supplemental Figure S1. Flow diagram of 56 tumor samples from 31 PM patients from UTSW and Cleveland Clinic. FF, fresh frozen. FFPE, formalin-fixed paraffin-embedded.**

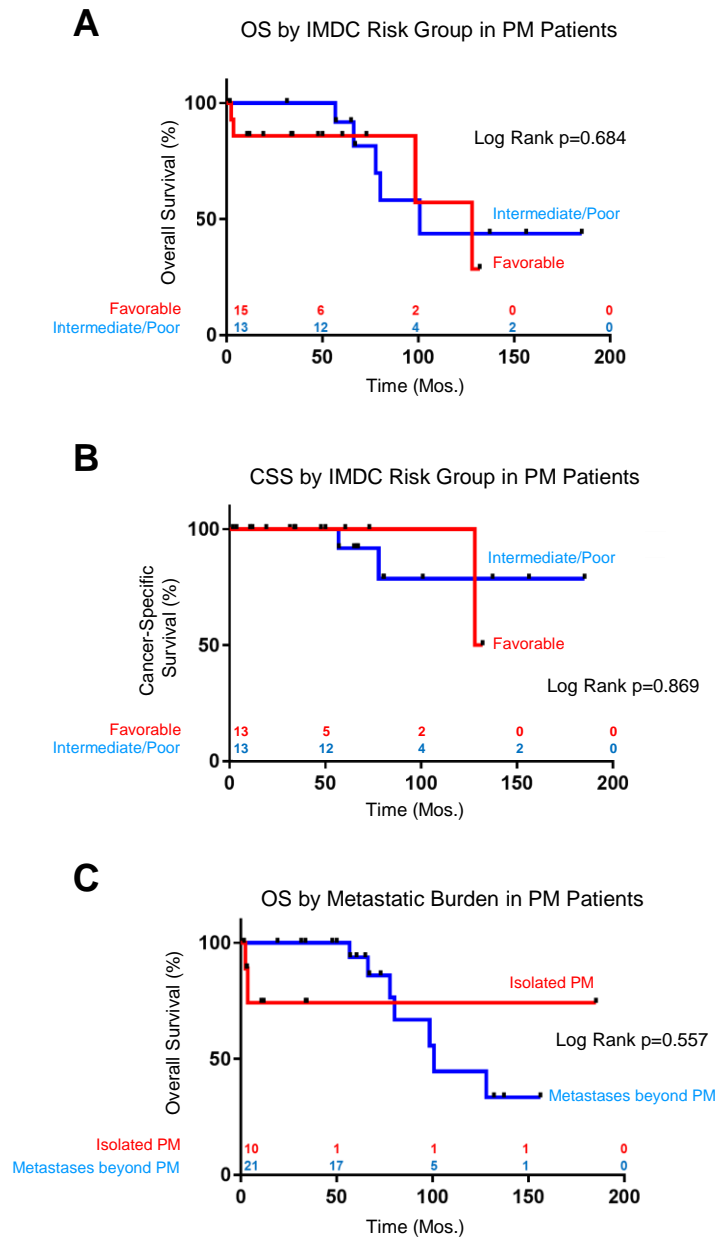

**Supplemental Figure S2. IMDC and tumor burden are not prognostic in PM patients.** (A) Overall Survival and (B) Cancer-Specific Survival of PM patients by IMDC risk group stratification. (C) Overall Survival analyses of PM patients comparing patients with isolated PM versus those with involvement of additional sites. Time is measured from metastatic diagnosis.

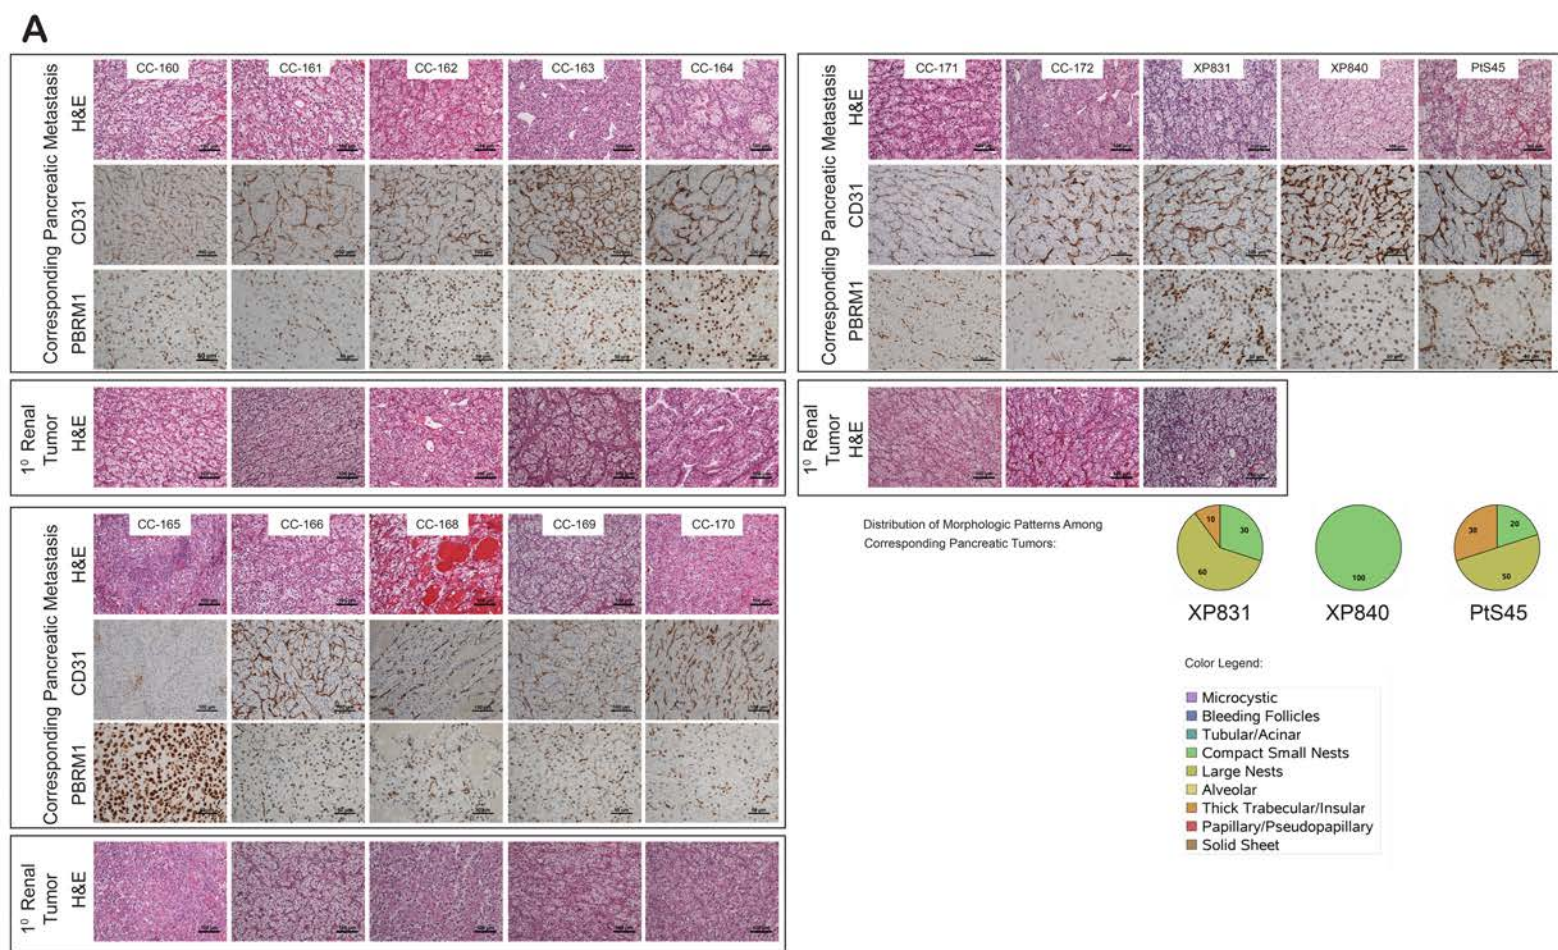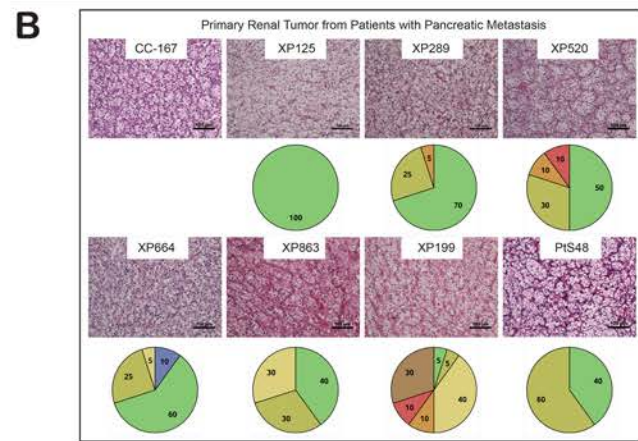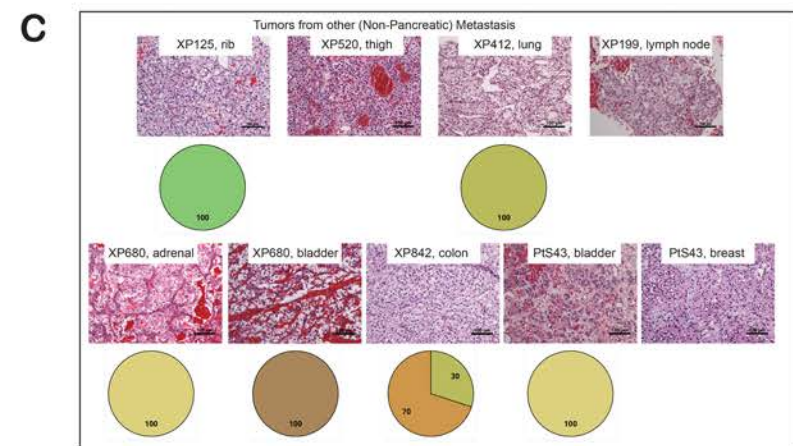

**Supplemental Figure S3. Histopathologic analysis of additional primary as well as pancreatic and non pancreatic metastases. (A)** Hematoxylin and eosin (H&E) sections, with immunohistochemistry for PBRM1 and CD31 of PM, as well as H&E of corresponding primary tumors with corresponding pie charts illustrating the relative percentage of the different architectures where sufficient sections for analyses were available. **(B)** H&E sections with corresponding pie charts of additional primary renal tumors of PM patients without available PM samples. **(C)** H&E sections with corresponding pie charts of non-pancreatic metastatic sites from PM cohort.

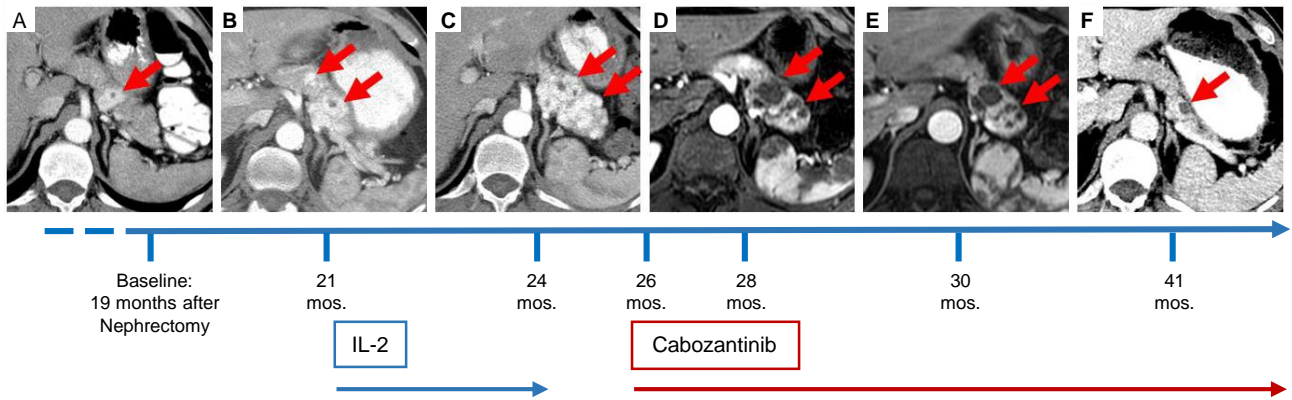

**Supplemental Figure S4. Devascularization of pancreatic metastases and tumor growth inhibition with cabozantinib but not IL2.** Axial contrast-enhanced CT (A, B, C, F) and MR (D, E) images of the upper abdomen acquired during the arterial phase in a patient with PM. PM that progressed through IL-2 immunotherapy (red arrows in B and C) became progressively devascularized and regressed with cabozantinib, an anti-angiogenic agent (D-F).

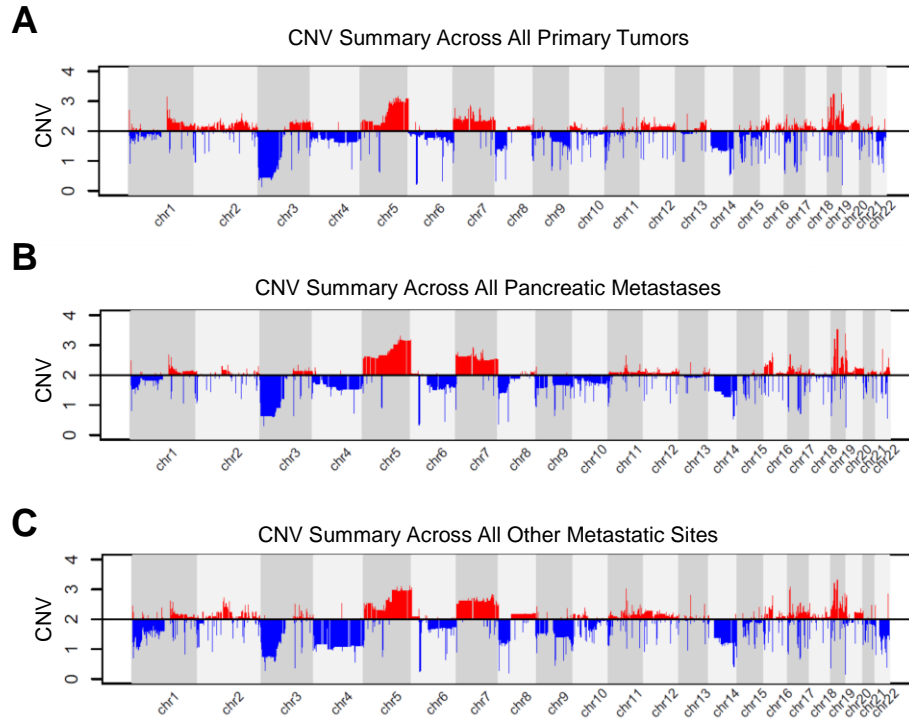

**Supplemental Figure S5. Pancreatic metastases exhibit a copy number alteration profile most similar to primary tumors.** Average copy number alterations according to tumor site, including (A) primary (n=21), (B) pancreatic (n=17), and (C) other (non-pancreatic; n=10) metastatic sites from patients with PM.



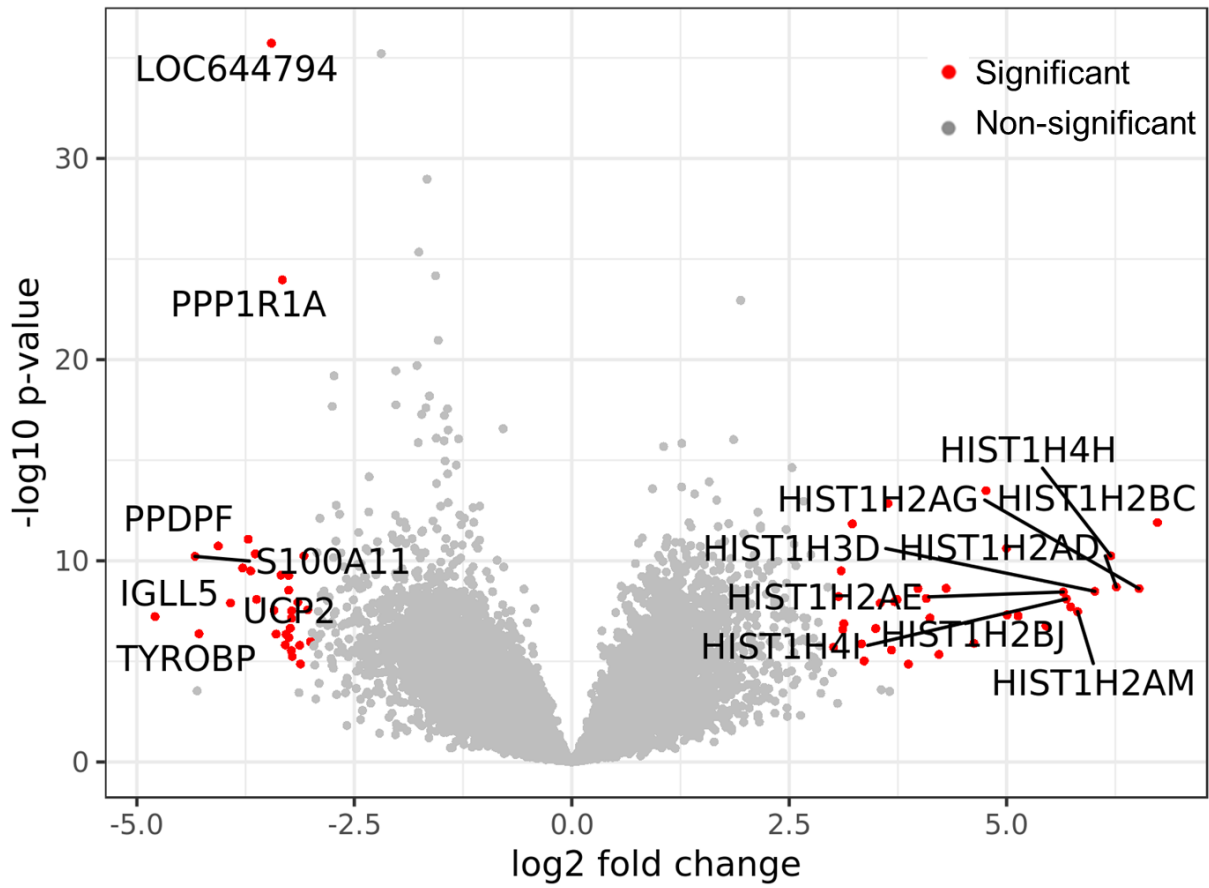

**Supplemental Figure S6. Volcano plot of differentially expressed genes in primary and metastatic tumors from patients with PM compared to non-PM metastatic ccRCC patients.** Log<sub>2</sub> fold-changes in gene expression (PM:non-PM) were calculated, and genes with fold-changes >3 or <-3 with p<0.0001 are shown with red dots.

**A** Angiogenesis Gene Expression Signature (IMmotion 150)

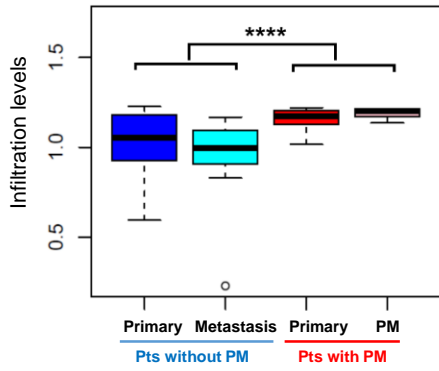

**B** Angiogenesis Gene Expression Signature (COMPARZ)

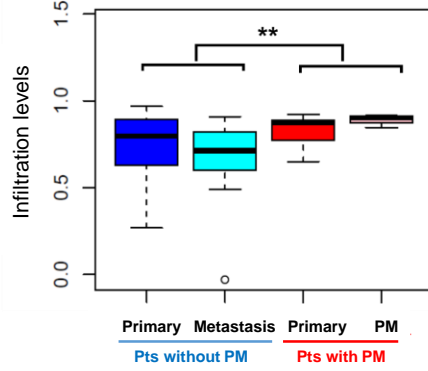

**C** T-effector Expression Signature (IMmotion 150)

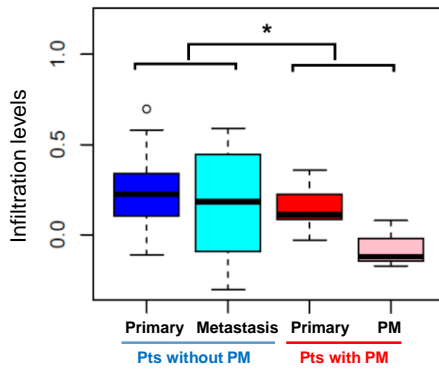

**D** Myeloid Inflammation Gene Expression Signature (IMmotion 150)

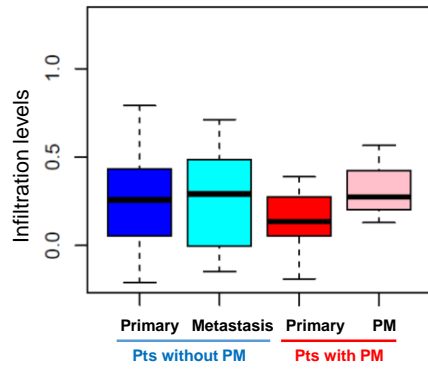

**Supplemental Figure S7. Pancreatic metastasis tumors are characterized by high angiogenesis and low inflammation based on IMmotion and COMPARZ signatures.** High angiogenesis and low inflammation in PM tumors according to IMmotion150 and COMPARZ gene signatures. Box-and-whisker plots comparing median relative gene expression levels and interquartile ranges (IQR) of the angiogenesis gene signatures used in the (A) IMmotion150 and (B) COMPARZ trials. Relative gene expression levels of the (C) T-effector and (D) myeloid signatures from the IMmotion150 trial are also shown. Open circles, most extreme data points (\* $p < 0.05$ , \*\* $p < 0.01$ , \*\*\* $p < 0.001$ , \*\*\*\* $p < 0.0001$ ).

| Sample ID   | Institution | Tumor Source | Fresh frozen (FF) vs. FFPE | IHC | WES                                      | RNAseq       | Consented to release of genomic data |
|-------------|-------------|--------------|----------------------------|-----|------------------------------------------|--------------|--------------------------------------|
| XP96T       | UTSW        | Kidney       | FF                         | Yes | 1620A-MK-312                             | 1620A-MK-340 | no                                   |
| XP125T1     | UTSW        | Kidney       | FF                         | Yes | 1620A-MK-314                             | 1620A-MK-341 | no                                   |
| XP133T1     | UTSW        | Kidney       | FF                         | Yes | 1620A-MK-316                             | 1620A-MK-342 | yes                                  |
| XP133M1     | UTSW        | Adrenal      | FFPE                       | Yes | 1620R_MK801                              | No           | yes                                  |
| XP133M2     | UTSW        | Pancreas     | FFPE                       | Yes | 1620R_MK802                              | No           | yes                                  |
| XP199T      | UTSW        | Kidney       | FF                         | Yes | 1620A-MK-318                             | 1620A-MK-343 | no                                   |
| XP203T      | UTSW        | Kidney       | FF                         | Yes | 1620A-MK-320                             | 1620A-MK-344 | no                                   |
| XP203M1     | UTSW        | Pancreas     | FF                         | Yes | 1620A-MK-321                             | 1620A-MK-345 | no                                   |
| XP289T      | UTSW        | Kidney       | FF                         | Yes | SAM19944213                              | SAM19944337  | no                                   |
| XP412M2     | UTSW        | Pancreas     | FFPE                       | Yes | SAM19944218_37475                        | No           | yes                                  |
| XP412M1     | UTSW        | Lung         | FFPE                       | Yes | 1620A-MK-303                             | No           | yes                                  |
| XP520T3     | UTSW        | Kidney       | FF                         | Yes | 1620A-MK-323                             | 1620A-MK-346 | yes                                  |
| XP664T2     | UTSW        | Kidney       | FF                         | Yes | 1620A-MK-325                             | 1620A-MK-347 | yes                                  |
| XP664M      | UTSW        | Pancreas     | FFPE                       | Yes | No                                       | No           | yes                                  |
| XP680M      | UTSW        | Lung         | FFPE                       | Yes | 1620A-MK-328                             | No           | no                                   |
| XP680M2     | UTSW        | Bladder      | FFPE                       | Yes | 1620A-MK-329                             | No           | no                                   |
| XP680M1     | UTSW        | Adrenal      | FFPE                       | Yes | 1620A-MK-327                             | No           | no                                   |
| XP831M      | UTSW        | Pancreas     | FF                         | Yes | 1620A-MK-331                             | 1620A-MK-349 | yes                                  |
| XP840M      | UTSW        | Pancreas     | FF                         | Yes | 1620A-MK-333                             | 1620A-MK-351 | yes                                  |
| XP842M      | UTSW        | Colon        | FF                         | Yes | 1620A-MK-335                             | 1620A-MK-352 | yes                                  |
| XP863T      | UTSW        | Kidney       | FF                         | Yes | 1620A-MK-337                             | 1620A-MK-353 | yes                                  |
| PtS43M      | UTSW        | Bladder      | FFPE                       | Yes | 1620A-MK-339                             | No           | no                                   |
| PtS45M      | UTSW        | Pancreas     | FFPE                       | Yes | 1620R-MK804                              | No           | no                                   |
| PtS47M1     | UTSW        | Pancreas     | FF                         | Yes | 1620R-MK810                              | No           | no                                   |
| PtS47T      | UTSW        | Kidney       | FF                         | Yes | 1620D-MK808                              | No           | no                                   |
| PtS47Th     | UTSW        | Thrombus     | FF                         | Yes | 1620D-MK809                              | No           | no                                   |
| PtS48T      | UTSW        | Kidney       | FF                         | Yes | 1620D-MK812                              | No           | no                                   |
| CC-UT-160M1 | CC          | Pancreas     | FFPE                       | Yes | CC-UT-160C_AACTCACC_BCC8T8ANXX_L007_001  | No           | no                                   |
| CC-UT-160T  | CC          | Kidney       | FFPE                       | Yes | No                                       | No           | no                                   |
| CC-UT-161M1 | CC          | Lymph node   | FFPE                       | No  | CC-UT-181C_GCCAAGAC-_ACCL7KANXX_L004_001 | No           | no                                   |
| CC-UT-161M  | CC          | Pancreas     | FFPE                       | Yes | CC-UT-161C_GCTAACGA_BCC8T8ANXX_L008_001  | No           | no                                   |
| CC-UT-161T  | CC          | Kidney       | FFPE                       | Yes | CC-UT-161A_ATCATTCC_BCC8T8ANXX_L003_001  | No           | no                                   |
| CC-UT-162T  | CC          | Kidney       | FFPE                       | Yes | No                                       | No           | no                                   |
| CC-UT-162M  | CC          | Pancreas     | FFPE                       | Yes | No                                       | No           | no                                   |
| CC-UT-163T  | CC          | Kidney       | FFPE                       | Yes | No                                       | No           | no                                   |
| CC-UT-163M  | CC          | Pancreas     | FFPE                       | Yes | No                                       | No           | no                                   |
| CC-UT-163M1 | CC          | Adrenal      | FFPE                       | No  | No                                       | No           | no                                   |
| CC-UT-164T  | CC          | Kidney       | FFPE                       | Yes | No                                       | No           | no                                   |
| CC-UT-164M1 | CC          | Pancreas     | FFPE                       | Yes | CC-UT-164C_CTGTAGCC_BCC8T8ANXX_L001_001  | No           | no                                   |
| CC-UT-165M1 | CC          | Lymph node   | FFPE                       | No  | CC-UT-183C_GACTAGTA-_ACCL7KANXX_L004_001 | No           | no                                   |
| CC-UT-165M  | CC          | Pancreas     | FFPE                       | Yes | CC-UT-165C_GCTCGGTA_BCC8T8ANXX_L004_001  | No           | no                                   |
| CC-UT-165T  | CC          | Kidney       | FFPE                       | Yes | CC-UT-165A_GCCACATA_BCC8T8ANXX_L006_001  | No           | no                                   |
| CC-UT-166M  | CC          | Pancreas     | FFPE                       | Yes | CC-UT-166C_ACACGACC_BCC8T8ANXX_L005_001  | No           | no                                   |
| CC-UT-166T  | CC          | Kidney       | FFPE                       | Yes | CC-UT-166A_ACCACTGT_BCC8T8ANXX_L005_001  | No           | no                                   |
| CC-UT-167T  | CC          | Kidney       | FFPE                       | Yes | CC-UT-167A_CTGGCATA_BCC8T8ANXX_L001_001  | No           | no                                   |
| CC-UT-168T  | CC          | Kidney       | FFPE                       | Yes | CC-UT-168A_ACCTCAA_BCC8T8ANXX_L002_001   | No           | no                                   |
| CC-UT-168M  | CC          | Pancreas     | FFPE                       | Yes | CC-UT-168C_AGCTACTA_BCC8T8ANXX_L005_001  | No           | no                                   |
| CC-UT-169T  | CC          | Kidney       | FFPE                       | Yes | CC-UT-169A_GCGAGTAA_BCC8T8ANXX_L004_001  | No           | no                                   |
| CC-UT-169M  | CC          | Pancreas     | FFPE                       | Yes | CC-UT-169C_AACGCTTA_BCC8T8ANXX_L004_001  | No           | no                                   |
| CC-UT-170M1 | CC          | Pancreas     | FFPE                       | Yes | CC-UT-170C_GGAGAACA_BCC8T8ANXX_L007_001  | No           | no                                   |
| CC-UT-170T  | CC          | Kidney       | FFPE                       | Yes | CC-UT-170A_CACTTCGA-_ACCL7KANXX_L001_001 | No           | no                                   |
| CC-UT-171M1 | CC          | Adrenal      | FFPE                       | No  | CC-UT-182C_CGCTGATC_BCC8T8ANXX_L007_001  | No           | no                                   |
| CC-UT-171M  | CC          | Pancreas     | FFPE                       | Yes | CC-UT-171C_CATCAAGT_BCC8T8ANXX_L007_001  | No           | no                                   |
| CC-UT-171T  | CC          | Kidney       | FFPE                       | Yes | CC-UT-171A_ACTATGCA_BCC8T8ANXX_L006_001  | No           | no                                   |
| CC-UT-172T  | CC          | Kidney       | FFPE                       | Yes | CC-UT-172A_CGGATTGC_BCC8T8ANXX_L003_001  | No           | no                                   |
| CC-UT-172M1 | CC          | Pancreas     | FFPE                       | Yes | CC-UT-172C_AAGGTACA_BCC8T8ANXX_L007_001  | No           | no                                   |

**Supplemental Table S1. List of samples analyzed.**



| <b>Variable</b>                      | <b>PM patients</b> | <b>Historic control*</b> |
|--------------------------------------|--------------------|--------------------------|
| OS                                   | 31                 | 268                      |
| PFS (frontline angiogenic inhibitor) | 12                 | 177                      |
| PFS (mTOR inhibitor)                 | 6                  | 117                      |
| PFS (nivolumab)                      | 9                  | 66                       |
| PBRM1 IHC**                          | 30                 | 105                      |
| BAP1 IHC**                           | 30                 | 117                      |

*\*Historic control consists of patients with metastatic ccRCC without PM treated at UTSW*

*\*\*Includes only patients with interpretable and unequivocal IHC without heterogeneity between matched sites, where available*

**Supplemental Table S2.** Patients used in clinical analyses, including overall survival (OS), progression-free survival (PFS), and IHC comparisons for PBRM1 and BAP1.

|                                                  | CNV               | Patients (%) | Total Samples (%) | Primary Tumors (%) | PM (%)   | Other Metastatic Site (%) |
|--------------------------------------------------|-------------------|--------------|-------------------|--------------------|----------|---------------------------|
|                                                  | <b>Total</b>      | 29           | 48                | 21                 | 17       | 10                        |
| <b>Most common CNVs</b>                          | <b>3p losses</b>  | 27 (93%)     | 43 (90%)          | 19 (90%)           | 15 (88%) | 9 (90%)                   |
|                                                  | <b>5q gains</b>   | 21 (72%)     | 31 (65%)          | 12 (57%)           | 13 (76%) | 6 (60%)                   |
|                                                  | <b>7 gains</b>    | 12 (41%)     | 18 (38%)          | 4 (19%)            | 9 (53%)  | 5 (50%)                   |
| <b>CNVs associated with aggressive phenotype</b> | <b>9p losses</b>  | 10 (34%)     | 13 (27%)          | 3 (14%)            | 5 (29%)  | 5 (50%)                   |
|                                                  | <b>14q losses</b> | 15 (52%)     | 23 (48%)          | 9 (43%)            | 8 (47%)  | 6 (60%)                   |
|                                                  | <b>4q losses</b>  | 11 (38%)     | 18 (38%)          | 6 (29%)            | 6 (35%)  | 6 (60%)                   |
|                                                  | <b>8q gains</b>   | 8 (28%)      | 9 (19%)           | 4 (19%)            | 3 (18%)  | 2 (20%)                   |

**Supplemental Table S3A.** Frequencies of CNVs for the most common alterations in patients with PM and for those associated with more aggressive phenotypes in ccRCC (22,31,33,34-36). Presented both on a per-patient level and per-sample level with sample origin.

| CNV:<br>Per-patient analyses | Primary Tumor Samples                      |                                          | Metastatic-Only Cohort <sup>22</sup>                 |                                                  |                                                  |
|------------------------------|--------------------------------------------|------------------------------------------|------------------------------------------------------|--------------------------------------------------|--------------------------------------------------|
|                              | TRACERx Renal cohort (n=101) <sup>33</sup> | Sato et al. cohort (n=240) <sup>32</sup> | TRACERx Renal: “TRACERx cohort” (n=38) <sup>22</sup> | TRACERx Renal: “HUC cohort” (n=26) <sup>22</sup> | TRACERx Renal: “MSK cohort” (n=34) <sup>22</sup> |
| <b>3p losses</b>             | 96%                                        | 94%                                      | 97%                                                  | 96%                                              | 97%                                              |
| <b>5q gains</b>              | 73%                                        | 65%                                      | 74%                                                  | 77%                                              | 65%                                              |
| <b>7 gains</b>               | 56%                                        | 41%                                      | 76%                                                  | 69%                                              | 71%                                              |
| <b>9p losses</b>             | 59%                                        | 25%                                      | 87%                                                  | 85%                                              | 82%                                              |
| <b>14q losses</b>            | 65%                                        | 27%                                      | 76%                                                  | 81%                                              | 88%                                              |
| <b>4q losses</b>             | 40%                                        | -                                        | 53%                                                  | 54%                                              | 56%                                              |
| <b>8q gains</b>              | 37%                                        | -                                        | 47%                                                  | 46%                                              | 44%                                              |

**Supplemental Table S3B.** Frequencies of selected CNVs in ccRCC patients from published cohorts, including analyses on primary tumor samples (32,33) and across matched samples in purely metastatic cohorts (22). Analyses were conducted on a per-patient level.
